# Supplementary material
Source: PubMed Central journal article supplement (PMC2749104)
Supplement: supp_M109.036384_jbc.M109.036384-2.pdf [file supp_M109.036384_jbc.M109.036384-2.pdf]

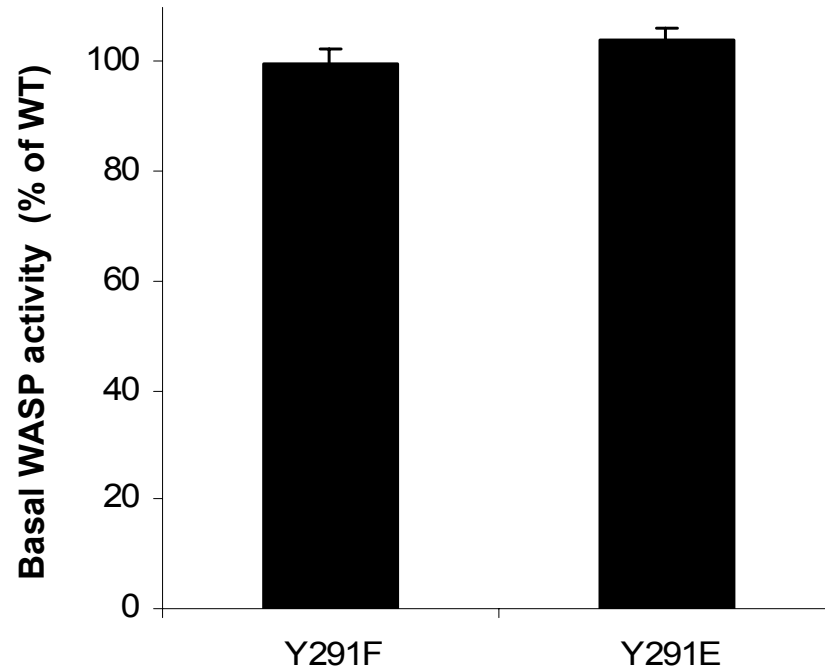

**Suppl. Figure 2** RAW/LR5 cells expressing WASPbs wild-type, Y291F or Y291E were fixed and WASP activation was determined and represented as percent change compared to WASPbs wild-type expressing cells.  $n \geq 5$  independent experiments  $\pm$  SEM.
